# Supplementary material for: High wellbeing with lower energy consumption: scenarios for India’s residential sector
Source: Research Square preprint supplement (doi:10.21203/rs.3.rs-8300022/v1), 2026-01-14
Supplement: Supplementary file 1 [file b809cde0decd172b78d845a6.xlsx]

## Sheet: metadata
Source data
High wellbeing with lower energy consumption: scenarios for India’s residential sector
This spreadsheets contains source data for all figures in the manuscript and supplementary information
List of sheets	Figure
fig1a	Figure 1 a
fig1b	Figure 1 b
fig1c	Figure 1 c
fig2a	Figure 2 a
fig2b	Figure 2 b
fig2c	Figure 2 c
fig3a	Figure 3 a
fig3b	Figure 3 b
fig3c	Figure 3 c
fig4a	Figure 4 a
fig4b	Figure 4 b
fig4c	Figure 4 c
fig_SI1	Supplementary Figure 1
fig_SI2	Supplementary Figure 2
fig_SI3	Supplementary Figure 3
fig_SI4a	Supplementary Figure 4 a
fig_SI4b	Supplementary Figure 4 b
fig_SI4c	Supplementary Figure 4 c

## Sheet: fig1a
Model	Scenario	Region	Variable	Unit	2020	2025	2030	2035	2040	2045	2050
IMAGE	REF	India	Share|Air Conditioning Access	%	30.47	34.418	37.005	39.677	42.444	45.26	48.172
IMAGE	DL	India	Share|Air Conditioning Access	%	30.47	34.418	37.005	45.144	61.458	79.878	99.852
IMAGE	DL-DEM	India	Share|Air Conditioning Access	%	30.47	34.418	37.005	45.144	61.471	79.878	99.852
MESSAGEix- Buildings	REF	India	Share|Air Conditioning Access	%	21.339	24.572	27.244	30.943	36.007	42.313	48.698
MESSAGEix- Buildings	DL	India	Share|Air Conditioning Access	%	21.339	24.533	36.73	51.765	66.475	80.879	95
MESSAGEix- Buildings	DL-DEM	India	Share|Air Conditioning Access	%	21.339	24.533	36.73	51.765	66.475	80.879	95
PIER	REF	India	Share|Air Conditioning Access	%	6.953	11.301	18.927	31.185	51.064	75.111	81.524
PIER	DL	India	Share|Air Conditioning Access	%	6.953	12.127	21.435	36.759	62.799	81.269	87.944
PIER	DL-DEM	India	Share|Air Conditioning Access	%	6.953	12.127	21.435	36.759	62.799	81.269	87.944
IMAGE	REF	India	Share|Clean Cooking Access	%	39.285	54.103	58.56	64.252	78.311	84.019	85.413
IMAGE	DL	India	Share|Clean Cooking Access	%	39.285	54.103	66.371	86.708	99.567	100	100
IMAGE	DL-DEM	India	Share|Clean Cooking Access	%	39.285	54.115	67.253	88.106	99.863	100	100
MESSAGEix- Buildings	REF	India	Share|Clean Cooking Access	%	71.304	75.34	78.988	82.909	87.091	91.596	96.301
MESSAGEix- Buildings	DL	India	Share|Clean Cooking Access	%	71.304	77.025	82.381	88.046	94.02	100	100
MESSAGEix- Buildings	DL-DEM	India	Share|Clean Cooking Access	%	71.304	77.025	82.381	88.046	94.02	100	100
PIER	REF	India	Share|Clean Cooking Access	%	60.524	72.872	81.213	87.986	94.083	96.917	98.968
PIER	DL	India	Share|Clean Cooking Access	%	60.524	73.354	82.483	89.94	95.648	98.432	99.992
PIER	DL-DEM	India	Share|Clean Cooking Access	%	60.524	73.354	82.483	89.94	95.648	98.432	99.992
SAFARI	REF	India	Share|Clean Cooking Access	%	60.181	70.565	79.94	86.648	93.07	100	100
SAFARI	DL	India	Share|Clean Cooking Access	%	60.181	79.027	100	100	100	100	100
SAFARI	DL-DEM	India	Share|Clean Cooking Access	%	60.181	79.027	100	100	100	100	100
IMAGE	REF	India	Share|Fan Access	%	93.242	99.111	99.371	99.481	99.589	99.665	99.721
IMAGE	DL	India	Share|Fan Access	%	93.242	99.111	99.371	99.481	99.589	99.665	99.852
IMAGE	DL-DEM	India	Share|Fan Access	%	93.242	99.111	99.371	99.481	99.589	99.665	99.852
PIER	REF	India	Share|Fan Access	%	88.626	96.373	99.475	100	100	100	100
PIER	DL	India	Share|Fan Access	%	88.626	96.961	99.638	100	100	100	100
PIER	DL-DEM	India	Share|Fan Access	%	88.626	96.961	99.638	100	100	100	100
HEB	REF	India	Share|Formal Settlements	%	96.046	96.015	95.926	95.804	95.665	95.53	95.402
HEB	DL	India	Share|Formal Settlements	%	96.046	96.015	95.926	95.804	95.665	95.53	95.402
HEB	DL-DEM	India	Share|Formal Settlements	%	96.046	96.015	95.926	95.804	95.665	95.53	95.402
MESSAGEix- Buildings	REF	India	Share|Formal Settlements	%	90.271	88.808	87.806	87.289	87.244	87.623	88.343
MESSAGEix- Buildings	DL	India	Share|Formal Settlements	%	90.271	88.808	90.245	92.374	94.898	97.525	100
MESSAGEix- Buildings	DL-DEM	India	Share|Formal Settlements	%	90.271	88.808	90.245	92.374	94.898	97.525	100
SAFARI	REF	India	Share|Formal Settlements	%	86.562	88.027	89.316	89.386	89.797	90.838	91.879
SAFARI	DL	India	Share|Formal Settlements	%	86.562	92.256	100	100	100	100	100
IMAGE	REF	India	Share|Refrigerator Access	%	44.648	60.42	73.172	83.076	90.308	94.457	96.372
IMAGE	DL	India	Share|Refrigerator Access	%	44.648	60.42	74.836	89.869	100	100	100
IMAGE	DL-DEM	India	Share|Refrigerator Access	%	44.648	60.42	74.836	88.278	100	100	100
MESSAGEix- Buildings	REF	India	Share|Refrigerator Access	%	34.453	42.558	50.555	58.817	67.38	76.33	85.601
MESSAGEix- Buildings	DL	India	Share|Refrigerator Access	%	34.453	45.929	57.341	69.091	81.237	93.897	100
MESSAGEix- Buildings	DL-DEM	India	Share|Refrigerator Access	%	34.453	45.929	57.341	69.091	81.237	93.897	100
PIER	REF	India	Share|Refrigerator Access	%	39.493	50.212	62.54	71.939	79.143	85.086	90.879
PIER	DL	India	Share|Refrigerator Access	%	39.493	51.675	65.367	75.653	83.393	89.641	93.503
PIER	DL-DEM	India	Share|Refrigerator Access	%	39.493	51.675	65.367	75.653	83.393	89.641	93.503
IMAGE	REF	India	Share|Television Access	%	87.495	98.282	100	100	100	100	100
IMAGE	DL	India	Share|Television Access	%	87.495	98.282	99.998	100	100	100	100
IMAGE	DL-DEM	India	Share|Television Access	%	87.495	98.282	99.998	100	100	100	100
MESSAGEix- Buildings	REF	India	Share|Television Access	%	72.102	77.699	82.924	88.457	94.297	100	100
MESSAGEix- Buildings	DL	India	Share|Television Access	%	72.102	77.699	82.924	88.457	94.297	100	100
MESSAGEix- Buildings	DL-DEM	India	Share|Television Access	%	72.102	77.699	82.924	88.457	94.297	100	100
PIER	REF	India	Share|Television Access	%	68.773	74.855	84.169	92.153	96.472	98.388	99.917
PIER	DL	India	Share|Television Access	%	68.773	76.285	86.793	94.737	98.052	99.913	99.932
PIER	DL-DEM	India	Share|Television Access	%	68.773	76.285	86.793	94.737	98.052	99.913	99.932

## Sheet: fig1b
Model	Scenario	Region	Variable	Unit	2020	2025	2030	2035	2040	2045	2050
HEB	REF	India	Energy Service|Residential|Floor Space|Per-cap	m2/cap	13.211	14.328	16.13	17.858	19.521	21.138	22.717
HEB	DL	India	Energy Service|Residential|Floor Space|Per-cap	m2/cap	13.211	14.328	16.13	17.858	19.521	21.138	22.717
HEB	DL-DEM	India	Energy Service|Residential|Floor Space|Per-cap	m2/cap	13.211	14.328	16.13	17.858	19.521	21.138	22.717
IMAGE	REF	India	Energy Service|Residential|Floor Space|Per-cap	m2/cap	13.234	14.026	15.257	16.831	18.454	20.108	21.795
IMAGE	DL	India	Energy Service|Residential|Floor Space|Per-cap	m2/cap	13.234	14.026	15.257	16.831	18.454	20.108	21.795
IMAGE	DL-DEM	India	Energy Service|Residential|Floor Space|Per-cap	m2/cap	13.234	14.026	15.257	16.831	18.454	20.108	21.795
MESSAGEix- Buildings	REF	India	Energy Service|Residential|Floor Space|Per-cap	m2/cap	15.38	17.196	19.2	21.186	23.147	25.068	26.955
MESSAGEix- Buildings	DL	India	Energy Service|Residential|Floor Space|Per-cap	m2/cap	15.38	17.196	20.452	23.792	27.062	30.124	32.969
MESSAGEix- Buildings	DL-DEM	India	Energy Service|Residential|Floor Space|Per-cap	m2/cap	15.38	17.196	15.957	14.776	13.689	12.715	11.921
SAFARI	REF	India	Energy Service|Residential|Floor Space|Per-cap	m2/cap	12.501	14.02	15.903	18.373	21.442	24.943	28.775
SAFARI	DL	India	Energy Service|Residential|Floor Space|Per-cap	m2/cap	12.501	14.436	16.901	19.914	23.692	28.069	32.885
SAFARI	DL-DEM	India	Energy Service|Residential|Floor Space|Per-cap	m2/cap	12.501	14.436	16.901	19.914	23.692	28.069	32.885

## Sheet: fig1c
Model	Scenario	Region	Variable	Unit	2020	2025	2030	2035	2040	2045	2050
SAFARI	REF	India	Energy Service|Residential|Housing Units|Rural|Durable	Million	171.693	179.002	188.303	193.195	190.531	181.936	173.161
SAFARI	DL	India	Energy Service|Residential|Housing Units|Rural|Durable	Million	171.693	181.06	205.172	219.065	214.13	211.315	212.389
SAFARI	REF	India	Energy Service|Residential|Housing Units|Rural|Non-durable	Million	20.071	23.222	19.98	19.615	23.122	31.385	39.15
SAFARI	DL	India	Energy Service|Residential|Housing Units|Rural|Non-durable	Million	20.071	21.164	3.111	0	0	2.006	0
SAFARI	REF	India	Energy Service|Residential|Housing Units|Urban|Durable|Affordable	Million	64.352	74.967	85.904	95.446	104.636	113.826	123.016
SAFARI	DL	India	Energy Service|Residential|Housing Units|Urban|Durable|Affordable	Million	64.352	81.304	107.195	118.393	133.183	143.212	154.729
SAFARI	REF	India	Energy Service|Residential|Housing Units|Urban|Durable|Others	Million	42.77	56.952	73.717	96.025	125.439	160.08	195.578
SAFARI	DL	India	Energy Service|Residential|Housing Units|Urban|Durable|Others	Million	42.77	56.952	73.717	96.025	125.439	160.08	195.578
SAFARI	REF	India	Energy Service|Residential|Housing Units|Urban|Non-durable	Million	16.629	17.942	19.093	22.735	26.142	27.626	28.161
SAFARI	DL	India	Energy Service|Residential|Housing Units|Urban|Non-durable	Million	16.629	11.605	0	0	0	0	0

## Sheet: fig2a
Model	Scenario	Region	Variable	Unit	2020	2025	2030	2035	2040	2045	2050
IMAGE	REF	India	Final Energy|Residential|Appliances	EJ/yr	0.283	0.582	1.052	1.495	1.922	2.385	2.852
IMAGE	DL	India	Final Energy|Residential|Appliances	EJ/yr	0.283	0.582	1.121	1.663	2.183	2.56	2.934
IMAGE	DL-DEM	India	Final Energy|Residential|Appliances	EJ/yr	0.283	0.579	1.083	1.567	2.036	2.369	2.7
MESSAGEix- Buildings	REF	India	Final Energy|Residential|Appliances	EJ/yr	0.48	0.565	0.649	0.731	0.809	0.88	0.941
MESSAGEix- Buildings	DL	India	Final Energy|Residential|Appliances	EJ/yr	0.48	0.603	0.729	0.856	0.982	1.103	1.215
MESSAGEix- Buildings	DL-DEM	India	Final Energy|Residential|Appliances	EJ/yr	0.48	0.591	0.7	0.803	0.897	0.978	1.039
PIER	REF	India	Final Energy|Residential|Appliances	EJ/yr	0.584	0.599	0.631	0.691	0.769	0.859	0.964
PIER	DL	India	Final Energy|Residential|Appliances	EJ/yr	0.606	0.633	0.679	0.761	0.864	0.986	1.134
PIER	DL-DEM	India	Final Energy|Residential|Appliances	EJ/yr	0.541	0.556	0.589	0.656	0.737	0.833	0.947
SAFARI	REF	India	Final Energy|Residential|Appliances	EJ/yr	0.36	0.45	0.53	0.62	0.72	0.82	0.94
SAFARI	DL	India	Final Energy|Residential|Appliances	EJ/yr	0.36	0.48	0.64	0.72	0.78	0.85	0.96
SAFARI	DL-DEM	India	Final Energy|Residential|Appliances	EJ/yr	0.36	0.44	0.56	0.6	0.62	0.65	0.66
HEB	REF	India	Final Energy|Residential|Cooling	EJ/yr	1.918	2.458	3.349	4.203	4.974	5.605	5.89
HEB	DL	India	Final Energy|Residential|Cooling	EJ/yr	1.918	2.458	3.349	4.203	4.974	5.605	5.89
HEB	DL-DEM	India	Final Energy|Residential|Cooling	EJ/yr	1.918	2.458	3.287	3.625	3.456	3.19	2.987
IMAGE	REF	India	Final Energy|Residential|Cooling	EJ/yr	0.663	1.075	1.785	2.342	2.761	3.185	3.605
IMAGE	DL	India	Final Energy|Residential|Cooling	EJ/yr	0.663	1.075	1.785	2.541	3.582	4.829	6.292
IMAGE	DL-DEM	India	Final Energy|Residential|Cooling	EJ/yr	0.663	1.064	1.693	2.228	2.854	3.519	4.085
MESSAGEix- Buildings	REF	India	Final Energy|Residential|Cooling	EJ/yr	1.065	1.996	2.672	3.204	3.728	4.327	4.787
MESSAGEix- Buildings	DL	India	Final Energy|Residential|Cooling	EJ/yr	1.065	1.985	2.843	3.5	4.627	5.562	6.031
MESSAGEix- Buildings	DL-DEM	India	Final Energy|Residential|Cooling	EJ/yr	1.065	1.838	1.844	2.201	2.563	2.823	2.954
PIER	REF	India	Final Energy|Residential|Cooling	EJ/yr	0.751	0.967	1.072	1.399	1.715	2.121	2.646
PIER	DL	India	Final Energy|Residential|Cooling	EJ/yr	0.924	1.192	1.35	1.764	2.205	2.786	3.557
PIER	DL-DEM	India	Final Energy|Residential|Cooling	EJ/yr	0.886	1.067	1.131	1.382	1.644	1.972	2.384
SAFARI	REF	India	Final Energy|Residential|Cooling	EJ/yr	0.66	1.28	2.01	2.91	3.81	4.94	6.47
SAFARI	DL	India	Final Energy|Residential|Cooling	EJ/yr	0.66	1.99	4.23	4.7	5.05	5.45	6.81
SAFARI	DL-DEM	India	Final Energy|Residential|Cooling	EJ/yr	0.66	1.72	3.44	3.73	3.77	3.87	4.65
IMAGE	REF	India	Final Energy|Residential|Heating|Cooking	EJ/yr	2.58	2.423	2.434	2.399	2.2	2.127	2.11
IMAGE	DL	India	Final Energy|Residential|Heating|Cooking	EJ/yr	2.58	2.423	2.282	2.001	1.792	1.777	1.78
IMAGE	DL-DEM	India	Final Energy|Residential|Heating|Cooking	EJ/yr	2.58	2.423	2.268	1.949	1.74	1.714	1.691
MESSAGEix- Buildings	REF	India	Final Energy|Residential|Heating|Cooking	EJ/yr	4.104	3.655	3.313	3.048	2.836	2.662	2.515
MESSAGEix- Buildings	DL	India	Final Energy|Residential|Heating|Cooking	EJ/yr	4.104	3.532	3.095	2.756	2.486	2.269	2.09
MESSAGEix- Buildings	DL-DEM	India	Final Energy|Residential|Heating|Cooking	EJ/yr	4.104	3.521	3.072	2.72	2.437	2.205	2.011
PIER	REF	India	Final Energy|Residential|Heating|Cooking	EJ/yr	4.355	3.701	3.169	2.659	2.166	2.133	2.22
PIER	DL	India	Final Energy|Residential|Heating|Cooking	EJ/yr	4.355	3.676	3.083	2.514	2.034	2	2.101
PIER	DL-DEM	India	Final Energy|Residential|Heating|Cooking	EJ/yr	4.355	3.676	3.083	2.514	2.034	2	2.101
SAFARI	REF	India	Final Energy|Residential|Heating|Cooking	EJ/yr	3.792	3.43	3.198	3.069	2.965	2.858	2.869
SAFARI	DL	India	Final Energy|Residential|Heating|Cooking	EJ/yr	3.792	3.238	2.705	2.761	2.817	2.863	2.895
SAFARI	DL-DEM	India	Final Energy|Residential|Heating|Cooking	EJ/yr	3.792	3.238	2.705	2.761	2.817	2.863	2.895

## Sheet: fig2b
Model	Scenario	Region	Variable	Unit	2050
IMAGE	DL	India	Final Energy|Residential|Appliances|Change relative to Reference	%	2.878
IMAGE	DL-DEM	India	Final Energy|Residential|Appliances|Change relative to Reference	%	-5.344
MESSAGEix- Buildings	DL	India	Final Energy|Residential|Appliances|Change relative to Reference	%	29.141
MESSAGEix- Buildings	DL-DEM	India	Final Energy|Residential|Appliances|Change relative to Reference	%	10.443
PIER	DL	India	Final Energy|Residential|Appliances|Change relative to Reference	%	17.545
PIER	DL-DEM	India	Final Energy|Residential|Appliances|Change relative to Reference	%	-1.839
SAFARI	DL	India	Final Energy|Residential|Appliances|Change relative to Reference	%	2.128
SAFARI	DL-DEM	India	Final Energy|Residential|Appliances|Change relative to Reference	%	-29.787
HEB	DL	India	Final Energy|Residential|Cooling|Change relative to Reference	%	0
HEB	DL-DEM	India	Final Energy|Residential|Cooling|Change relative to Reference	%	-49.284
IMAGE	DL	India	Final Energy|Residential|Cooling|Change relative to Reference	%	74.517
IMAGE	DL-DEM	India	Final Energy|Residential|Cooling|Change relative to Reference	%	13.307
MESSAGEix- Buildings	DL	India	Final Energy|Residential|Cooling|Change relative to Reference	%	25.987
MESSAGEix- Buildings	DL-DEM	India	Final Energy|Residential|Cooling|Change relative to Reference	%	-38.291
PIER	DL	India	Final Energy|Residential|Cooling|Change relative to Reference	%	34.413
PIER	DL-DEM	India	Final Energy|Residential|Cooling|Change relative to Reference	%	-9.894
SAFARI	DL	India	Final Energy|Residential|Cooling|Change relative to Reference	%	5.255
SAFARI	DL-DEM	India	Final Energy|Residential|Cooling|Change relative to Reference	%	-28.13
IMAGE	DL	India	Final Energy|Residential|Heating|Cooking|Change relative to Reference	%	-15.639
IMAGE	DL-DEM	India	Final Energy|Residential|Heating|Cooking|Change relative to Reference	%	-19.85
MESSAGEix- Buildings	DL	India	Final Energy|Residential|Heating|Cooking|Change relative to Reference	%	-16.905
MESSAGEix- Buildings	DL-DEM	India	Final Energy|Residential|Heating|Cooking|Change relative to Reference	%	-20.024
PIER	DL	India	Final Energy|Residential|Heating|Cooking|Change relative to Reference	%	-5.367
PIER	DL-DEM	India	Final Energy|Residential|Heating|Cooking|Change relative to Reference	%	-5.367
SAFARI	DL	India	Final Energy|Residential|Heating|Cooking|Change relative to Reference	%	0.899
SAFARI	DL-DEM	India	Final Energy|Residential|Heating|Cooking|Change relative to Reference	%	0.899

## Sheet: fig2c
Model	Scenario	Region	Variable	Unit	2020	2025	2030	2035	2040	2045	2050
IMAGE	REF	India	Final Energy|Residential	EJ/yr	6.724	7.308	8.69	9.488	9.916	10.714	11.683
IMAGE	DL	India	Final Energy|Residential	EJ/yr	6.724	7.342	9.433	10.416	11.585	13.314	15.372
IMAGE	DL-DEM	India	Final Energy|Residential	EJ/yr	6.724	7.344	9.275	9.924	10.604	11.619	12.597
MESSAGEix- Buildings	REF	India	Final Energy|Residential	EJ/yr	5.941	6.527	6.965	7.336	7.75	8.273	8.675
MESSAGEix- Buildings	DL	India	Final Energy|Residential	EJ/yr	5.941	6.43	7.001	7.471	8.481	9.349	9.782
MESSAGEix- Buildings	DL-DEM	India	Final Energy|Residential	EJ/yr	5.941	6.228	5.896	6.009	6.186	6.302	6.309
PIER	REF	India	Final Energy|Residential	EJ/yr	5.69	5.266	4.872	4.75	4.65	5.088	5.73
PIER	DL	India	Final Energy|Residential	EJ/yr	5.886	5.5	5.111	5.04	5.103	5.745	6.681
PIER	DL-DEM	India	Final Energy|Residential	EJ/yr	5.781	5.298	4.803	4.552	4.415	4.782	5.342
SAFARI	REF	India	Final Energy|Residential	EJ/yr	4.866	5.222	5.809	6.679	7.585	8.72	10.394
SAFARI	DL	India	Final Energy|Residential	EJ/yr	4.866	5.77	7.646	8.261	8.737	9.265	10.78
SAFARI	DL-DEM	India	Final Energy|Residential	EJ/yr	4.866	5.46	6.776	7.171	7.297	7.485	8.32

## Sheet: fig3a
Model	Scenario	Region	Variable	Unit	2020	2025	2030	2035	2040	2045	2050
IMAGE	REF	India	Final Energy|Residential|Biomass	EJ/yr	4.238	3.257	2.655	1.943	1.03	0.706	0.615
IMAGE	DL	India	Final Energy|Residential|Biomass	EJ/yr	4.238	3.311	2.809	1.248	0.109	0.003	0
IMAGE	DL-DEM	India	Final Energy|Residential|Biomass	EJ/yr	4.238	3.324	2.785	1.219	0.146	0.031	0
MESSAGEix- Buildings	REF	India	Final Energy|Residential|Biomass	EJ/yr	3.155	2.597	2.149	1.779	1.465	1.195	0.959
MESSAGEix- Buildings	DL	India	Final Energy|Residential|Biomass	EJ/yr	3.155	2.445	1.87	1.392	0.984	0.632	0.326
MESSAGEix- Buildings	DL-DEM	India	Final Energy|Residential|Biomass	EJ/yr	3.155	2.41	1.825	1.338	0.921	0.559	0.242
PIER	REF	India	Final Energy|Residential|Biomass	EJ/yr	3.282	2.398	1.724	1.123	0.557	0.403	0.298
PIER	DL	India	Final Energy|Residential|Biomass	EJ/yr	3.282	2.366	1.613	0.942	0.393	0.244	0.158
PIER	DL-DEM	India	Final Energy|Residential|Biomass	EJ/yr	3.282	2.366	1.613	0.942	0.393	0.244	0.158
SAFARI	REF	India	Final Energy|Residential|Biomass	EJ/yr	2.24	1.548	1.02	0.655	0.327	0	0
SAFARI	DL	India	Final Energy|Residential|Biomass	EJ/yr	2.24	1.103	0	0	0	0	0
SAFARI	DL-DEM	India	Final Energy|Residential|Biomass	EJ/yr	2.24	1.103	0	0	0	0	0
IMAGE	REF	India	Final Energy|Residential|Electricity	EJ/yr	1.137	2.008	3.474	5.127	6.849	8.447	9.726
IMAGE	DL	India	Final Energy|Residential|Electricity	EJ/yr	1.137	2.008	3.563	5.685	8.638	11.323	13.764
IMAGE	DL-DEM	India	Final Energy|Residential|Electricity	EJ/yr	1.137	1.991	3.426	5.36	7.903	10.058	11.5
MESSAGEix- Buildings	REF	India	Final Energy|Residential|Electricity	EJ/yr	1.561	2.598	3.382	4.022	4.651	5.35	5.898
MESSAGEix- Buildings	DL	India	Final Energy|Residential|Electricity	EJ/yr	1.561	2.628	3.641	4.457	5.743	6.833	7.448
MESSAGEix- Buildings	DL-DEM	India	Final Energy|Residential|Electricity	EJ/yr	1.561	2.53	2.728	3.279	3.828	4.266	4.558
PIER	REF	India	Final Energy|Residential|Electricity	EJ/yr	1.339	1.574	1.724	2.146	2.576	3.124	3.826
PIER	DL	India	Final Energy|Residential|Electricity	EJ/yr	1.534	1.833	2.05	2.582	3.162	3.922	4.924
PIER	DL-DEM	India	Final Energy|Residential|Electricity	EJ/yr	1.43	1.632	1.742	2.095	2.474	2.951	3.554
SAFARI	REF	India	Final Energy|Residential|Electricity	EJ/yr	1.074	1.799	2.629	3.659	4.704	5.969	7.654
SAFARI	DL	India	Final Energy|Residential|Electricity	EJ/yr	1.074	2.539	4.959	5.549	6.01	6.543	8.078
SAFARI	DL-DEM	India	Final Energy|Residential|Electricity	EJ/yr	1.074	2.229	4.089	4.459	4.57	4.763	5.618
IMAGE	REF	India	Final Energy|Residential|Gas	EJ/yr	0	0.03	0.133	0.193	0.164	0.074	0.042
IMAGE	DL	India	Final Energy|Residential|Gas	EJ/yr	0	0.028	0.15	0.273	0.298	0.28	0.386
IMAGE	DL-DEM	India	Final Energy|Residential|Gas	EJ/yr	0	0.028	0.243	0.508	0.557	0.492	0.537
MESSAGEix- Buildings	REF	India	Final Energy|Residential|Gas	EJ/yr	0.013	0.071	0.135	0.204	0.276	0.352	0.429
MESSAGEix- Buildings	DL	India	Final Energy|Residential|Gas	EJ/yr	0.013	0.083	0.16	0.242	0.33	0.42	0.513
MESSAGEix- Buildings	DL-DEM	India	Final Energy|Residential|Gas	EJ/yr	0.013	0.083	0.16	0.243	0.331	0.422	0.515
PIER	REF	India	Final Energy|Residential|Gas	EJ/yr	0.041	0.052	0.079	0.077	0.075	0.074	0.073
PIER	DL	India	Final Energy|Residential|Gas	EJ/yr	0.041	0.052	0.079	0.077	0.076	0.075	0.074
PIER	DL-DEM	India	Final Energy|Residential|Gas	EJ/yr	0.041	0.052	0.079	0.077	0.076	0.075	0.074
SAFARI	REF	India	Final Energy|Residential|Gas	EJ/yr	0.033	0.061	0.097	0.113	0.114	0.114	0.114
SAFARI	DL	India	Final Energy|Residential|Gas	EJ/yr	0.033	0.061	0.097	0.113	0.114	0.114	0.114
SAFARI	DL-DEM	India	Final Energy|Residential|Gas	EJ/yr	0.033	0.061	0.097	0.113	0.114	0.114	0.114
IMAGE	REF	India	Final Energy|Residential|Oil	EJ/yr	1.21	1.736	2.067	1.99	1.779	1.483	1.299
IMAGE	DL	India	Final Energy|Residential|Oil	EJ/yr	1.21	1.732	2.489	2.905	2.406	1.699	1.219
IMAGE	DL-DEM	India	Final Energy|Residential|Oil	EJ/yr	1.21	1.737	2.401	2.531	1.862	1.028	0.555
MESSAGEix- Buildings	REF	India	Final Energy|Residential|Oil	EJ/yr	1.206	1.252	1.29	1.323	1.349	1.369	1.379
MESSAGEix- Buildings	DL	India	Final Energy|Residential|Oil	EJ/yr	1.206	1.267	1.321	1.372	1.416	1.455	1.485
MESSAGEix- Buildings	DL-DEM	India	Final Energy|Residential|Oil	EJ/yr	1.206	1.196	1.173	1.14	1.097	1.044	0.981
PIER	REF	India	Final Energy|Residential|Oil	EJ/yr	1.029	1.242	1.345	1.403	1.442	1.5	1.576
PIER	DL	India	Final Energy|Residential|Oil	EJ/yr	1.029	1.249	1.369	1.439	1.472	1.523	1.594
PIER	DL-DEM	India	Final Energy|Residential|Oil	EJ/yr	1.029	1.249	1.369	1.439	1.472	1.523	1.594
SAFARI	REF	India	Final Energy|Residential|Oil	EJ/yr	1.483	1.779	2.044	2.241	2.434	2.635	2.627
SAFARI	DL	India	Final Energy|Residential|Oil	EJ/yr	1.483	2.035	2.58	2.599	2.613	2.608	2.588
SAFARI	DL-DEM	India	Final Energy|Residential|Oil	EJ/yr	1.483	2.035	2.58	2.599	2.613	2.608	2.588
IMAGE	REF	India	Final Energy|Residential|Others	EJ/yr	0.14	0.278	0.36	0.236	0.094	0.005	0.001
IMAGE	DL	India	Final Energy|Residential|Others	EJ/yr	0.14	0.263	0.421	0.304	0.134	0.008	0.004
IMAGE	DL-DEM	India	Final Energy|Residential|Others	EJ/yr	0.14	0.264	0.421	0.305	0.136	0.01	0.004
MESSAGEix- Buildings	REF	India	Final Energy|Residential|Others	EJ/yr	0.008	0.008	0.008	0.008	0.009	0.009	0.009
MESSAGEix- Buildings	DL	India	Final Energy|Residential|Others	EJ/yr	0.008	0.008	0.008	0.008	0.009	0.009	0.009
MESSAGEix- Buildings	DL-DEM	India	Final Energy|Residential|Others	EJ/yr	0.008	0.008	0.009	0.01	0.01	0.011	0.012
SAFARI	REF	India	Final Energy|Residential|Others	EJ/yr	0.036	0.035	0.019	0.01	0.007	0.003	0
SAFARI	DL	India	Final Energy|Residential|Others	EJ/yr	0.036	0.031	0.01	0	0	0	0
SAFARI	DL-DEM	India	Final Energy|Residential|Others	EJ/yr	0.036	0.031	0.01	0	0	0	0

## Sheet: fig3b
Model	Scenario	Region	Variable	Unit	2020	2025	2030	2035	2040	2045	2050
IMAGE	REF	India	Final Energy|Residential|Electricity	EJ/yr	1.137	2.008	3.474	5.127	6.849	8.447	9.726
IMAGE	DL	India	Final Energy|Residential|Electricity	EJ/yr	1.137	2.008	3.563	5.685	8.638	11.323	13.764
IMAGE	DL-DEM	India	Final Energy|Residential|Electricity	EJ/yr	1.137	1.991	3.426	5.36	7.903	10.058	11.5
MESSAGEix- Buildings	REF	India	Final Energy|Residential|Electricity	EJ/yr	1.561	2.598	3.382	4.022	4.651	5.35	5.898
MESSAGEix- Buildings	DL	India	Final Energy|Residential|Electricity	EJ/yr	1.561	2.628	3.641	4.457	5.743	6.833	7.448
MESSAGEix- Buildings	DL-DEM	India	Final Energy|Residential|Electricity	EJ/yr	1.561	2.53	2.728	3.279	3.828	4.266	4.558
PIER	REF	India	Final Energy|Residential|Electricity	EJ/yr	1.339	1.574	1.724	2.146	2.576	3.124	3.826
PIER	DL	India	Final Energy|Residential|Electricity	EJ/yr	1.534	1.833	2.05	2.582	3.162	3.922	4.924
PIER	DL-DEM	India	Final Energy|Residential|Electricity	EJ/yr	1.43	1.632	1.742	2.095	2.474	2.951	3.554
SAFARI	REF	India	Final Energy|Residential|Electricity	EJ/yr	1.074	1.799	2.629	3.659	4.704	5.969	7.654
SAFARI	DL	India	Final Energy|Residential|Electricity	EJ/yr	1.074	2.539	4.959	5.549	6.01	6.543	8.078
SAFARI	DL-DEM	India	Final Energy|Residential|Electricity	EJ/yr	1.074	2.229	4.089	4.459	4.57	4.763	5.618

## Sheet: fig3c
Model	Scenario	Region	Variable	Unit	2050
IMAGE	DL	India	Final Energy|Residential|Electricity|Change relative to Reference	%	41.513
IMAGE	DL-DEM	India	Final Energy|Residential|Electricity|Change relative to Reference	%	18.241
MESSAGEix- Buildings	DL	India	Final Energy|Residential|Electricity|Change relative to Reference	%	26.28
MESSAGEix- Buildings	DL-DEM	India	Final Energy|Residential|Electricity|Change relative to Reference	%	-22.72
PIER	DL	India	Final Energy|Residential|Electricity|Change relative to Reference	%	28.672
PIER	DL-DEM	India	Final Energy|Residential|Electricity|Change relative to Reference	%	-7.127
SAFARI	DL	India	Final Energy|Residential|Electricity|Change relative to Reference	%	5.544
SAFARI	DL-DEM	India	Final Energy|Residential|Electricity|Change relative to Reference	%	-26.597

[truncated: 9 more sheets: fig4a, fig4b, fig4c, fig_SI1, fig_SI2, fig_SI3, fig_SI4a, fig_SI4b, fig_SI4c]
